# Supplementary material for: Modulation of gut microbiota during probiotic-mediated attenuation of metabolic syndrome in high fat diet-fed mice
Source: PubMed Central journal article supplement — ISME J. 2014 Jun 17;9(1):1–15. doi: 10.1038/ismej.2014.99 (PMC4274436; doi:10.1038/ismej.2014.99), 2014-06-17
Supplement: ismej201499x1.pdf [file ismej201499x1.pdf]

**Modulation of Gut Microbiota during Probiotics-Mediated  
Attenuation of Metabolic Syndrome in High Fat Diet-Fed Mice**

1

2 Jingjing Wang<sup>1,2</sup>, Huang Tang<sup>2</sup>, Chenhong Zhang<sup>2</sup>, Yufeng Zhao<sup>1</sup>, Muriel Derrien<sup>3</sup>, Emilie Rocher<sup>3</sup>,  
3 Johan ET van-Hylckama Vlieg<sup>3</sup>, Katherine Strissel<sup>4</sup>, Liping Zhao<sup>1,2</sup>, Martin Obin<sup>4</sup>, Jian Shen<sup>1\*</sup>

4

5 **Supplementary Information**

6

7 **Summary**

8 The supplementary information includes supplementary materials and methods,  
9 eleven supplementary figures and four supplementary tables.

10

11

## 12 **Supplementary Materials and Methods**

### 13 **Animal trial**

#### 14 **A. Mice**

15 Forty male SPF grade C57BL/6J mice at 10 weeks of age, with a weight between 22.5  
16 to 26.5g, were purchased from National Rodent Laboratory Animal Resources. Mice  
17 were kept under stable conditions with a 12-hour daylight cycle, a temperature of 22 ±  
18 3 °C, and free access to water and food in accredited animal facilities of Shanghai  
19 Laboratory Animal Center (SLAC).

20 All animal procedures and protocols were performed in accordance with  
21 institutional guidelines of SLAC and with approval from the institutional animal care  
22 and use committee of SLAC.

#### 23 **B. Bacteria suspension preparation**

24 The three strains were cultured with MRS broth (OXOID, Basingstoke, UK) at 37 °C  
25 to reach early stationary phase. The cultures were centrifuged, and bacteria cells were  
26 resuspended with fresh MRS broth to 10<sup>8</sup> colony-forming units (CFUs) / 200µl, stored  
27 at -80 °C and each aliquot was thawed 1 hour before it was administered to each  
28 mouse by gavage. The number of the bacterial cells was determined by plating the  
29 serial dilutions of the inoculum suspensions on MRS agar plates.

#### 30 **C. Sample collection**

31 Animal treatments lasted for 12 weeks, during which the body weight of each mouse  
32 and food intake of every cage of mice (four mice per cage) were measured once a  
33 week. Stool samples were collected from each of the 40 mice (8 mice per group) at  
34 baseline and 12th week by keeping individual animals in a metabolic cage for 8 hours,  
35 and immediately stored at -80 °C for subsequent microbiota analysis. The feces at each  
36 time points was collected on two adjacent days, and stools of four mice from each  
37 group were collected on each day.

38 To monitor the fecal recovery of the strains, three mice were randomly selected in  
39 each group at 2nd, 6th and 11th week after the start of the probiotic administration,  
40 and fecal samples from these mice were collected, and stored at -80 °C for RNA  
41 extraction and subsequent quantification of the strain.

42 At the end of the 12th week, after 5 h of food deprivation, all blood was collected  
43 from the orbital plexus, and serum was isolated by centrifugation at 3000 rpm at 4 °C  
44 for 15 min and stored at -80 °C for subsequent biochemical testing. All animals were  
45 sacrificed by cervical dislocation. eAT, liver and jejunum were excised. For liver, the  
46 free end of the largest lobe was sampled in RNALater (Ambion, Austin, TX, USA),  
47 and the fixed end in paraformaldehyde. The left depot of epididymal adipose tissue  
48 was longitudinally cut into two halves, the middle part of the right half was sampled  
49 in RNALater, and the left half in paraformaldehyde. For jejunum, 2 cm of intestine  
50 tissue 1.5 cm away from the stomach pylori was excised and kept in RNALater. These  
51 samples were collected from each mouse. Cecal content was collected and snap  
52 frozen in liquid nitrogen, and then stored at -80 °C until analysis.

#### 53 **D. Quantification of the probiotic strains in feces**

54 Total RNA was extracted from 20 mg fresh fecal sample by a modified acid  
55 guanidinium thiocyanate-phenol-chloroform extraction method as described  
56 previously (Matsuda *et al.*, 2007) and submitted to reverse transcription (RT)-  
57 quantitative (q) PCR.

58 RT-qPCR was performed using an OneStep RT-PCR kit (QIAGEN, Hilden,  
59 Germany) according to manufacturer's instructions on a DNA Engine OPTICON2  
60 continuous Fluorescence Detector (MJ research, Waltham, MA, USA). Primers are  
61 listed in Supplementary Table S2. Data were collected and analyzed using MJ Opticon  
62 Monitor Analysis Software accompanying the PCR machine.

#### 63 **E. Oral glucose tolerance test (OGTT)**

64 After 5 h of food deprivation, glucose was administered orally to the mice at a dose of  
65 2.0 g/kg body weight. Blood samples were taken from the tail before and 15, 30, 60,  
66 and 120 min after glucose administration, and blood glucose levels were measured  
67 with a blood glucose meter (Accu-Check; Roche Diagnostics, Mannheim, Germany).  
68 The blood glucose level before glucose administration represented fasting glucose  
69 level.

70

#### 71 **Histomorphology and immunohistochemistry**

72 Digital images of hematoxylin and eosin-stained sections were acquired with an  
73 Olympus DX51 light microscope. Adipocyte size (cross-sectional area) was obtained  
74 from perimeter tracings using Image J software (Sun Microsystems, Mountain View,  
75 CA, USA). For each mouse, cell areas were determined in at least two histologic  
76 sections cut 50 µm apart (>500 total adipocytes). Immunohistochemistry was  
77 performed using VectaStain kits (Vector Labs, Burlingame, CA, USA). Primary  
78 antibodies were rat anti-mouse Mac-2 (cat. # CL8942AP, Cedarlane Labs, Ontario,  
79 Canada) and goat anti-mouse MMP-12 (Santa Cruz Labs, Santa Cruz, CA, USA).  
80 Isotype-matched nonimmune IgG or peptide-neutralized primary antibody served as  
81 negative controls. All morphometric and immunohistochemistry studies were  
82 performed by individuals who were 'blinded' to the sample treatments.

83

#### 84 **Quantification of host gene expression**

85 Total RNA was extracted from about 100 mg eAT, 30 mg liver and 40 mg jejunum  
86 using RNeasy<sup>®</sup> lipid tissue mini kit (QIAGEN, Hilden, Germany), according to the  
87 manufacturer's instructions. RNA concentrations were measured using the NanoVue  
88 spectrophotometer (GE Healthcare, Waukesha, WI, USA) and the integrity was  
89 checked by denaturing agarose gel electrophoresis.

90 Contaminating DNA was removed using the DNase I (Invitrogen Life Technologies,  
91 Carlsbad, CA, USA) digestion according to the manufacturer's instructions, and  
92 DNA contamination was tested by PCR with primer targeting housekeeping gene  
93 GAPDH. RNA concentrations were measured again. Complementary DNA (cDNA)  
94 was generated from 500 ng of high-quality total RNA with SuperScript<sup>™</sup> III  
95 First-Strand synthesis system (Invitrogen Life Technologies, Carlsbad, CA, USA).

96 Real-time quantitative PCR was performed with the iQ<sup>™</sup> SYBR<sup>®</sup> Green Surpermix  
97 (BIO-RAD, Hercules, CA, USA) on a DNA Engine OPTICON2 continuous  
98 Fluorescence Detector (MJ research, Waltham, MA, USA). Data were collected and  
99 analyzed using MJ Opticon Monitor Analysis Software accompanying the PCR  
100 machine. All mRNA quantification data were normalized to GAPDH. Gene  
101 expression levels were expressed as values relative to the mouse group fed on normal

102 chow.

103

#### 104 **Bioinformatics and statistical analysis of 454 pyrosequencing data**

105 High-quality reads for bioinformatics analysis were selected by processing the raw  
106 data as following: 1) search the primers by using blast-based matching (Word size=4,  
107 E-value=0.1), the primer at least at the sequencing end should exist; 2) locate the  
108 barcodes according to the position of the primers; reads should have at least one  
109 complete barcode; reads without entire barcodes at both ends, or with complete but  
110 poor-matched barcode pairs (more than one insertion / deletion / mismatch) were  
111 discarded; 3) according to the complete barcode (if the barcodes were complete at  
112 both ends and they were mismatched, take the barcode at the sequencing end ), assign  
113 the read to the corresponding sample; 4) after trimming the primer and barcode bases,  
114 those sequences with variable region more than 100 nt and less than 300 nt in length  
115 and no more than two undetermined bases were preserved.

116 All high-quality sequences were aligned by Nearest Alignment Space Termination  
117 (NAST) multi-aligner with template length  $\geq 90$  bases and percent identity  $\geq 75\%$  in  
118 Greengenes database, and then clustered using CD-HIT with 100% similarity. The  
119 most abundant sequence of each cluster was selected as the representative of unique  
120 sequence, and then searched against the RDP database (RDP Classifier) at 50%  
121 confidence level to determine the phylogeny. The representative sequences were also  
122 imported into the ARB to construct a neighbor-joining tree. OTUs were classified  
123 with DOTUR at 98% similarity level. Rarefaction analysis and Shannon diversity  
124 index were calculated using QIIME (Caporaso *et al.*, 2010). Principal component  
125 analysis (PCA) was performed on relative abundances (normalized for each sample)  
126 of OTUs, and weighted Fast UniFrac principal coordinate analysis (PCoA) was done  
127 with the phylogenetic tree constructed by inserting the representative of each OTU  
128 into pre-established phylogenetic trees of full-length 16S rRNA gene sequences in  
129 ARB. The statistical significance of the separation among animal groups in PCoA  
130 scores plots was assessed by multivariate analysis of variance (MANOVA) test with  
131 MATLAB R2010a (The MathWorks, Inc., Natick, MA, USA). The relative

132 abundance of each OTU was log-transformed, and used to construct RDA models to  
133 find the OTUs that were different between two animal groups with Canoco for  
134 Windows 4.5 (Microcomputer Power, Ithaca, NY, USA) according to the  
135 manufacturer's instructions. Statistical significance was assessed by Monte Carlo  
136 Permutation Procedure (MCP) with 499 random permutations under the full model.  
137

#### 138 **Cecal fermentation end products measurement**

139 Two milliliters supernatant was prepared by reconstituting all cecal content of each  
140 animal in 0.01M phosphate buffer solution (PBS) followed by centrifugation at 9000g  
141 for 5 min at 4 °C. The supernatant was acidified with a 1/10 volume of 50% H<sub>2</sub>SO<sub>4</sub>  
142 and extracted with ethyl ether. The concentrations of SCFAs and BCFAs were  
143 determined in the organic phase using an Agilent 6890N gas chromatograph (Agilent  
144 Technologies, Wilmington, DE, USA) equipped with a polar HP-FFAP capillary  
145 column (0.25 mm × 0.25 mm × 30 m) and flame ionization detector (Agilent  
146 Technologies, Wilmington, DE, USA). Helium was used as the carrier gas. The initial  
147 oven temperature was 120 °C, which was maintained for 16 min and then raised to  
148 122 °C at 5 °C / min, increased to 250 °C at 30 °C / min, and held at this temperature for  
149 3 min. The detector temperature was 270 °C, and the injector temperature was 260 °C.  
150 Data handling was performed with an Agilent ChemStation (version G2070AA,  
151 Agilent Technologies, Wilmington, DE, USA).

152

153

154 **Supplementary Tables**155 **Table S1 Compositions of experimental diets**

| Ingredients                           | Normal chow diet         | High fat diet           |
|---------------------------------------|--------------------------|-------------------------|
|                                       | (Research Diets D12450B) | (Research Diets D12492) |
| g / 100 g diet                        |                          |                         |
| Casein, 80 Mesh                       | 18.96                    | 25.85                   |
| L-Cystine                             | 0.28                     | 0.39                    |
| Corn Starch                           | 29.86                    | 0.00                    |
| Maltodextrin 10                       | 3.32                     | 16.15                   |
| Sucrose                               | 33.18                    | 8.89                    |
| Cellulose, BW200                      | 4.74                     | 6.46                    |
| Soybean Oil                           | 2.37                     | 3.23                    |
| Lard                                  | 1.90                     | 31.66                   |
| Mineral Mix, S10026                   | 0.95                     | 1.29                    |
| DiCalcium Phosphate                   | 1.23                     | 1.68                    |
| Calcium Carbonate                     | 0.52                     | 0.71                    |
| Potassium Citrate, 1 H <sub>2</sub> O | 1.56                     | 2.13                    |
| Vitamin Mix, V10001                   | 0.95                     | 1.29                    |
| Choline Bitartrate                    | 0.19                     | 0.26                    |

156 **Table S2 List of primers used in this study**

| Target                                                                       | Sequences (5'-3')*                                                         | Product size (bp) | Annealing temperature ( °C) | References                       |
|------------------------------------------------------------------------------|----------------------------------------------------------------------------|-------------------|-----------------------------|----------------------------------|
| <b>Bacterial 16S rRNA gene</b>                                               |                                                                            |                   |                             |                                  |
| V3 region                                                                    | F: <u>NNNNNNNN</u> CCTACGGGAGGCAGCAG<br>R: <u>NNNNNNNN</u> ATTACCGCGGCTGCT | About 200         | 65-55<br>(touch down)       | (Zhang <i>et al.</i> , 2010)     |
| <i>Lactobacillus paracasei</i> (LC) /<br><i>Lactobacillus rhamnosus</i> (LR) | F: ACCGCATGGTTCTTGGC<br>R: CCGACAACAGTTACTCTGCC                            | 296               | 60                          | (Matsuda <i>et al.</i> , 2009)   |
| <i>Bifidobacterium animalis</i> subsp.<br><i>lactis</i> (BA)                 | F: CCCTTTCCACGGGTCCC<br>R: AAGGGAAACCGTGTCTCCAC                            | 194               | 65                          | (Matsumoto <i>et al.</i> , 2009) |
| <b>Mouse genes</b>                                                           |                                                                            |                   |                             |                                  |
| GAPDH                                                                        | F: GTGTTCTACCCCAATGTGT<br>R: ATTGTCATACCAGGAAATGAGCTT                      | 248               | 55                          | (Masui <i>et al.</i> , 2007)     |
| CD11c                                                                        | F: CTGGATAGCCTTTCTTCTGCTG<br>R: GCACACTGTGTCCGAACTC                        | 113               | 55                          | (Lumeng <i>et al.</i> , 2007)    |
| TNF $\alpha$                                                                 | F: ACGGCATGGATCTCAAAGAC<br>R: AGATAGCAAATCGGCTGACG                         | 138               | 55                          | (Chiang <i>et al.</i> , 2009)    |
| MCP-1                                                                        | F: TTAAAAACCTGGATCGGAACCAA<br>R: GCATTAGCTTCAGATTTACGGGT                   | 121               | 55                          | (Chiang <i>et al.</i> , 2009)    |
| adiponectin                                                                  | F: AGGTTGGATGGCAGGC<br>R: GTCTACCCTTAGGACCAAGAA                            | 129               | 55                          | (Shibata <i>et al.</i> , 2007)   |
| leptin                                                                       | F: CCTGTGGCTTTGGTCCTATCTG<br>R: AGGCAAGCTGGTGAGGATCTG                      | 244               | 55                          | (Klaus <i>et al.</i> , 2005)     |

157 \*The NNNNNNNN was the unique 8-base barcode which was used to sort PCR products into different samples.



158 **Table S3 The number of sequences lost during the bioinformatics analysis of the**  
 159 **454 pyrosequencing run containing the 80 fecal samples of the present study<sup>a</sup>**

| Sequencing defects                                                 | Number of sequences lost<br>(percentage accounting to the<br>total sequences of the run) |
|--------------------------------------------------------------------|------------------------------------------------------------------------------------------|
| Sequences with unqualified primers <sup>b</sup>                    | 3606 (0.57%)                                                                             |
| Sequences with unqualified barcode <sup>c</sup>                    | 127154 (20.26%)                                                                          |
| Sequences with too short variable region (<90bp)                   | 526 (0.08%)                                                                              |
| Sequences with undetermined bases in variable<br>region (>2 bases) | 4 (0.0006%)                                                                              |
| <b>Total</b>                                                       | <b>131290 (20.93%)</b>                                                                   |

160 <sup>a</sup>, Totally 148 samples were sequenced in this 454 run, and 627349 reads were obtained.

161 <sup>b</sup>, The primer for the 16S rRNA gene V3 region at the sequencing end could not be found in the sequences.

162 <sup>c</sup>, In these sequences, complete barcode could not be found at neither ends, or barcodes at both ends was  
 163 poor-matched with more than one insertion / deletion / mismatch, or barcodes that did not exist in the barcode table  
 164 were found.

165 **Table S4 The phylogeny and relative abundance of the 83 OTUs altered by probiotics, and the p value of Mann-Whitney test evaluating**  
 166 **the abundance difference of these OTUs between each probiotic group and HFD group. In grey are underlined the significant p values**  
 167 **(P < 0.05)**

| OTU ID  | Taxonomical assignments<br>(RDP Classifier) |                                  |                                           | Relative abundance (%)<br>Median (minimum, maximum) |                   |                   |                   |                    | P values calculated by Mann-Whitney test |         |         |         |
|---------|---------------------------------------------|----------------------------------|-------------------------------------------|-----------------------------------------------------|-------------------|-------------------|-------------------|--------------------|------------------------------------------|---------|---------|---------|
|         | Phylum                                      | Family                           | Genus                                     | HFD+LC                                              | HFD+LR            | HFD+BA            | HFD               | NC                 | HFD+LC                                   | HFD+LR  | HFD+BA  | NC      |
|         |                                             |                                  |                                           |                                                     |                   |                   |                   |                    | vs. HFD                                  | vs. HFD | vs. HFD | vs. HFD |
| OTU0379 | Actinobacteria                              | <i>Bifidobacteriaceae</i>        | <i>Bifidobacterium</i>                    | 0.00 (0.00, 0.11)                                   | 0.00 (0.00, 0.00) | 0.01 (0.00, 0.23) | 0.00 (0.00, 0.00) | 0.47 (0.00, 3.21)  | 1.0000                                   | 1.0000  | 0.0769  | 0.0014  |
| OTU0173 | Actinobacteria                              | <i>Coriobacteriaceae</i>         | <i>Olsenella</i>                          | 0.01 (0.00, 0.51)                                   | 0.60 (0.41, 1.58) | 0.26 (0.00, 0.50) | 0.01 (0.00, 0.22) | 0.47 (0.03, 1.86)  | 0.8629                                   | 0.0003  | 0.0258  | 0.0042  |
| OTU0109 | Bacteroidetes                               | <i>Porphyromonadaceae</i>        | <i>Barnesiella</i>                        | 0.74 (0.00, 1.33)                                   | 0.21 (0.03, 1.80) | 0.41 (0.00, 1.75) | 0.00 (0.00, 0.00) | 1.04 (0.10, 2.78)  | 0.0014                                   | 0.0003  | 0.0014  | 0.0002  |
| OTU0002 | Bacteroidetes                               | <i>Porphyromonadaceae</i>        | <i>Barnesiella</i>                        | 0.05 (0.00, 0.18)                                   | 0.03 (0.00, 0.08) | 0.01 (0.00, 0.11) | 0.00 (0.00, 0.07) | 0.11 (0.00, 0.93)  | 0.0373                                   | 0.4615  | 0.5301  | 0.0068  |
| OTU0054 | Firmicutes                                  | <i>Erysipelotrichaceae</i>       | <i>Allobaculum</i>                        | 1.23 (0.00, 3.76)                                   | 2.41 (1.36, 4.95) | 1.30 (0.05, 2.47) | 0.58 (0.00, 2.25) | 6.96 (3.34, 19.13) | 0.3807                                   | 0.0022  | 0.1304  | 0.0002  |
| OTU0073 | Firmicutes                                  | <i>Erysipelotrichaceae</i>       | <i>Allobaculum</i>                        | 0.19 (0.00, 0.45)                                   | 3.42 (1.00, 8.64) | 0.71 (0.00, 4.01) | 0.00 (0.00, 0.61) | 2.72 (0.17, 6.78)  | 0.2668                                   | 0.0003  | 0.0200  | 0.0003  |
| OTU0059 | Firmicutes                                  | <i>Erysipelotrichaceae</i>       | <i>Allobaculum</i>                        | 0.00 (0.00, 0.37)                                   | 0.00 (0.00, 0.16) | 0.00 (0.00, 0.05) | 0.00 (0.00, 0.00) | 1.43 (0.18, 4.89)  | 0.4667                                   | 0.1538  | 1.0000  | 0.0002  |
| OTU0455 | Firmicutes                                  | <i>Ruminococcaceae</i>           |                                           | 0.00 (0.00, 0.09)                                   | 0.00 (0.00, 0.15) | 0.06 (0.00, 0.20) | 0.00 (0.00, 0.09) | 0.06 (0.00, 0.13)  | 0.8564                                   | 0.4615  | 0.0623  | 0.0145  |
| OTU0043 | Firmicutes                                  | <i>Lachnospiraceae</i>           |                                           | 0.35 (0.00, 0.58)                                   | 0.00 (0.00, 0.00) | 0.00 (0.00, 0.10) | 0.00 (0.00, 0.00) | 0.05 (0.00, 0.37)  | 0.0014                                   | 1.0000  | 1.0000  | 0.0070  |
| OTU0306 | Firmicutes                                  | <i>Lachnospiraceae</i>           |                                           | 0.17 (0.00, 0.72)                                   | 0.21 (0.00, 0.84) | 0.51 (0.00, 0.71) | 0.00 (0.00, 0.03) | 0.55 (0.05, 1.83)  | 0.0126                                   | 0.0028  | 0.0256  | 0.0002  |
| OTU0025 | Bacteroidetes                               | <i>Porphyromonadaceae</i>        | <i>Barnesiella</i>                        | 2.63 (1.96, 3.70)                                   | 3.65 (1.01, 6.11) | 1.71 (0.61, 3.20) | 2.03 (0.96, 3.03) | 0.63 (0.03, 1.17)  | 0.0499                                   | 0.0205  | 1.0000  | 0.0070  |
| OTU0190 | Bacteroidetes                               | <i>Porphyromonadaceae</i>        | <i>Barnesiella</i>                        | 0.02 (0.00, 0.14)                                   | 0.21 (0.03, 0.57) | 0.04 (0.00, 0.27) | 0.01 (0.00, 0.29) | 0.00 (0.00, 0.00)  | 1.0000                                   | 0.0482  | 0.6291  | 0.0769  |
| OTU0132 | Bacteroidetes                               | <i>Porphyromonadaceae</i>        | <i>Barnesiella</i>                        | 0.29 (0.14, 1.79)                                   | 0.66 (0.11, 2.19) | 0.63 (0.07, 1.35) | 0.23 (0.11, 0.43) | 0.00 (0.00, 0.02)  | 0.2345                                   | 0.0401  | 0.0281  | 0.0002  |
| OTU0536 | Firmicutes                                  | <i>Erysipelotrichaceae</i>       | <i>Erysipelotrichaceae_incertae_sedis</i> | 0.32 (0.03, 0.61)                                   | 0.00 (0.00, 0.18) | 0.11 (0.00, 0.45) | 0.09 (0.00, 0.20) | 0.00 (0.00, 0.03)  | 0.0274                                   | 0.4289  | 0.6402  | 0.0126  |
| OTU0011 | TM7                                         | <i>TM7_genera_incertae_sedis</i> | <i>TM7_genera_incertae_sedis</i>          | 0.36 (0.28, 0.88)                                   | 0.13 (0.00, 0.76) | 0.27 (0.00, 0.78) | 0.21 (0.07, 0.52) | 0.15 (0.05, 0.62)  | 0.1304                                   | 0.8665  | 0.8785  | 0.5737  |
| OTU0605 | Actinobacteria                              | <i>Coriobacteriaceae</i>         | <i>Enterorhabdus</i>                      | 0.00 (0.00, 0.06)                                   | 0.03 (0.00, 0.08) | 0.00 (0.00, 0.03) | 0.00 (0.00, 0.00) | 0.00 (0.00, 0.00)  | 0.4667                                   | 0.0513  | 0.4667  | 1.0000  |
| OTU0055 | Bacteroidetes                               | <i>Bacteroidaceae</i>            | <i>Bacteroides</i>                        | 2.73 (0.68, 4.54)                                   | 1.03 (0.44, 1.46) | 1.61 (0.68, 5.98) | 1.03 (0.25, 2.29) | 1.72 (0.35, 3.06)  | 0.0650                                   | 0.7789  | 0.1949  | 0.2345  |
| OTU0556 | Bacteroidetes                               | <i>Prevotellaceae</i>            | <i>Paraprevotella</i>                     | 0.15 (0.05, 0.23)                                   | 0.06 (0.03, 0.28) | 0.05 (0.02, 0.22) | 0.04 (0.00, 0.49) | 0.00 (0.00, 0.39)  | 0.0145                                   | 0.2222  | 0.2670  | 0.3049  |
| OTU0399 | Bacteroidetes                               | <i>Prevotellaceae</i>            | <i>Paraprevotella</i>                     | 0.06 (0.05, 0.15)                                   | 0.00 (0.00, 0.10) | 0.02 (0.00, 0.16) | 0.04 (0.00, 0.16) | 0.00 (0.00, 0.12)  | 0.1588                                   | 0.2723  | 0.8757  | 0.1002  |
| OTU1290 | Bacteroidetes                               | <i>Porphyromonadaceae</i>        | <i>Parabacteroides</i>                    | 0.01 (0.00, 0.29)                                   | 0.00 (0.00, 0.00) | 0.00 (0.00, 1.00) | 0.00 (0.00, 0.00) | 0.00 (0.00, 0.00)  | 0.0769                                   | 1.0000  | 0.2000  | 1.0000  |
| OTU0007 | Bacteroidetes                               | <i>Porphyromonadaceae</i>        | <i>Barnesiella</i>                        | 0.85 (0.23, 2.45)                                   | 0.26 (0.00, 1.80) | 0.11 (0.00, 1.47) | 0.00 (0.00, 0.49) | 0.03 (0.00, 0.73)  | 0.0011                                   | 0.0528  | 0.2668  | 0.5301  |
| OTU0037 | Bacteroidetes                               | <i>Porphyromonadaceae</i>        | <i>Barnesiella</i>                        | 0.00 (0.00, 0.03)                                   | 0.03 (0.03, 0.15) | 0.00 (0.00, 0.11) | 0.00 (0.00, 0.07) | 0.00 (0.00, 0.07)  | 0.7333                                   | 0.0099  | 0.8564  | 1.0000  |

|         |                |                                          |                         |                    |                   |                   |                    |                   |        |        |        |        |
|---------|----------------|------------------------------------------|-------------------------|--------------------|-------------------|-------------------|--------------------|-------------------|--------|--------|--------|--------|
| OTU1132 | Bacteroidetes  | <i>Porphyromonadaceae</i>                | <i>Barnesiella</i>      | 0.00 (0.00, 0.00)  | 0.00 (0.00, 0.13) | 0.00 (0.00, 0.02) | 0.00 (0.00, 0.00)  | 0.00 (0.00, 0.03) | 1.0000 | 0.1538 | 1.0000 | 1.0000 |
| OTU0071 | Bacteroidetes  | <i>Porphyromonadaceae</i>                | <i>Barnesiella</i>      | 0.00 (0.00, 0.13)  | 0.09 (0.00, 0.32) | 0.00 (0.00, 0.08) | 0.00 (0.00, 0.13)  | 0.00 (0.00, 0.06) | 1.0000 | 0.0155 | 0.7333 | 0.7333 |
| OTU1472 | Bacteroidetes  | <i>Porphyromonadaceae</i>                | <i>Barnesiella</i>      | 0.00 (0.00, 0.00)  | 0.00 (0.00, 1.79) | 0.00 (0.00, 0.00) | 0.00 (0.00, 0.00)  | 0.00 (0.00, 0.00) | 1.0000 | 0.1538 | 1.0000 | 1.0000 |
| OTU2173 | Proteobacteria | <i>Desulfovibrionaceae</i>               |                         | 0.00 (0.00, 0.14)  | 0.00 (0.00, 0.16) | 0.03 (0.00, 0.09) | 0.00 (0.00, 0.00)  | 0.00 (0.00, 0.00) | 1.0000 | 0.1538 | 0.0256 | 1.0000 |
| OTU0938 | Proteobacteria |                                          |                         | 0.00 (0.00, 0.10)  | 0.03 (0.00, 0.13) | 0.09 (0.02, 0.26) | 0.00 (0.00, 0.11)  | 0.05 (0.00, 0.12) | 0.8825 | 0.1308 | 0.0044 | 0.2190 |
| OTU0105 | Proteobacteria | <i>Helicobacteraceae</i>                 | <i>Helicobacter</i>     | 2.12 (0.98, 4.74)  | 0.87 (0.39, 2.27) | 0.84 (0.22, 2.82) | 1.17 (0.35, 2.29)  | 0.92 (0.24, 2.28) | 0.0148 | 0.9551 | 0.5054 | 0.5054 |
| OTU0579 | Firmicutes     | <i>Erysipelotrichaceae</i>               | <i>Allobaculum</i>      | 0.00 (0.00, 0.16)  | 0.03 (0.00, 0.39) | 0.01 (0.00, 0.61) | 0.00 (0.00, 0.00)  | 0.00 (0.00, 0.00) | 1.0000 | 0.0513 | 0.0769 | 1.0000 |
| OTU0958 | Firmicutes     | <i>Streptococcaceae</i>                  | <i>Streptococcus</i>    | 0.00 (0.00, 0.06)  | 0.00 (0.00, 0.04) | 0.01 (0.00, 0.06) | 0.00 (0.00, 0.00)  | 0.00 (0.00, 0.00) | 0.2000 | 0.4000 | 0.0769 | 1.0000 |
| OTU0647 | Firmicutes     | <i>Lactobacillaceae</i>                  | <i>Lactobacillus</i>    | 0.00 (0.00, 0.08)  | 0.09 (0.00, 0.32) | 0.00 (0.00, 0.44) | 0.00 (0.00, 0.05)  | 0.00 (0.00, 0.10) | 1.0000 | 0.0087 | 1.0000 | 0.9282 |
| OTU0195 | Firmicutes     | <i>Lactobacillaceae</i>                  | <i>Lactobacillus</i>    | 2.95 (0.60, 7.46)  | 0.53 (0.15, 1.51) | 3.31 (1.37, 4.82) | 0.00 (0.00, 0.00)  | 0.00 (0.00, 0.03) | 0.0002 | 0.0003 | 0.0002 | 0.4667 |
| OTU1276 | Firmicutes     | Unclassified_Clostridiales               |                         | 0.00 (0.00, 0.06)  | 0.00 (0.00, 0.00) | 0.03 (0.00, 0.07) | 0.00 (0.00, 0.04)  | 0.00 (0.00, 0.00) | 1.0000 | 1.0000 | 0.0629 | 1.0000 |
| OTU1852 | Firmicutes     | Unclassified_Clostridiales               |                         | 0.00 (0.00, 0.00)  | 0.00 (0.00, 0.03) | 0.00 (0.00, 0.00) | 0.00 (0.00, 0.00)  | 0.00 (0.00, 0.00) | 1.0000 | 0.1538 | 1.0000 | 1.0000 |
| OTU0277 | Bacteroidetes  | <i>Ruminococcaceae</i>                   | <i>Acetivibrio</i>      | 0.01 (0.00, 0.07)  | 0.00 (0.00, 0.03) | 0.04 (0.00, 0.15) | 0.00 (0.00, 0.08)  | 0.00 (0.00, 0.03) | 0.4126 | 0.8205 | 0.0623 | 1.0000 |
| OTU0274 | Firmicutes     | <i>Ruminococcaceae</i>                   | <i>Acetivibrio</i>      | 0.01 (0.00, 0.23)  | 0.00 (0.00, 0.00) | 0.00 (0.00, 0.08) | 0.00 (0.00, 0.00)  | 0.00 (0.00, 0.02) | 0.0769 | 1.0000 | 0.2000 | 1.0000 |
| OTU0275 | Firmicutes     | <i>Ruminococcaceae</i>                   |                         | 0.12 (0.05, 0.60)  | 0.10 (0.00, 0.26) | 0.05 (0.00, 0.33) | 0.01 (0.00, 0.11)  | 0.05 (0.00, 0.10) | 0.0042 | 0.1141 | 0.2258 | 0.7085 |
| OTU2404 | Firmicutes     | <i>Ruminococcaceae</i>                   | <i>Oscillibacter</i>    | 0.00 (0.00, 0.00)  | 0.00 (0.00, 0.08) | 0.00 (0.00, 0.00) | 0.00 (0.00, 0.00)  | 0.00 (0.00, 0.03) | 1.0000 | 0.1538 | 1.0000 | 1.0000 |
| OTU0178 | Firmicutes     | <i>Lachnospiraceae</i>                   | <i>Clostridium XIVa</i> | 0.03 (0.00, 0.09)  | 0.00 (0.00, 0.12) | 0.04 (0.00, 0.17) | 0.00 (0.00, 0.00)  | 0.00 (0.00, 0.03) | 0.0070 | 0.4000 | 0.0256 | 0.4667 |
| OTU0580 | Firmicutes     | <i>Lachnospiraceae</i>                   |                         | 0.02 (0.00, 0.22)  | 0.10 (0.00, 0.42) | 0.08 (0.00, 0.33) | 0.00 (0.00, 0.03)  | 0.00 (0.00, 0.08) | 0.2821 | 0.0056 | 0.0884 | 0.5692 |
| OTU0374 | Firmicutes     | <i>Lachnospiraceae</i>                   |                         | 0.31 (0.03, 0.81)  | 0.09 (0.00, 0.49) | 0.00 (0.00, 1.03) | 0.00 (0.00, 0.35)  | 0.04 (0.00, 0.62) | 0.0019 | 0.3571 | 0.4256 | 0.4779 |
| OTU1643 | Firmicutes     | <i>Lachnospiraceae</i>                   |                         | 0.00 (0.00, 0.00)  | 0.03 (0.00, 0.64) | 0.03 (0.00, 0.10) | 0.00 (0.00, 0.05)  | 0.00 (0.00, 0.03) | 1.0000 | 0.1259 | 0.0064 | 1.0000 |
| OTU0215 | Firmicutes     | <i>Lachnospiraceae</i>                   |                         | 2.66 (0.54, 4.35)  | 1.01 (0.06, 2.78) | 0.15 (0.00, 2.05) | 0.41 (0.07, 1.07)  | 0.71 (0.00, 5.50) | 0.0047 | 0.0939 | 0.2786 | 0.6454 |
| OTU0328 | Firmicutes     | <i>Lachnospiraceae</i>                   |                         | 0.05 (0.00, 0.23)  | 0.00 (0.00, 0.08) | 0.06 (0.00, 0.10) | 0.00 (0.00, 0.13)  | 0.02 (0.00, 0.06) | 0.0200 | 0.9902 | 0.1134 | 0.5301 |
| OTU0419 | Firmicutes     | <i>Lachnospiraceae</i>                   | <i>Butyrivibrio</i>     | 0.00 (0.00, 0.00)  | 0.00 (0.00, 0.13) | 0.00 (0.00, 0.05) | 0.00 (0.00, 0.00)  | 0.00 (0.00, 0.17) | 1.0000 | 0.1538 | 0.4667 | 0.4667 |
| OTU0489 | Firmicutes     | <i>Lachnospiraceae</i>                   |                         | 0.15 (0.08, 0.32)  | 0.09 (0.00, 0.36) | 0.10 (0.03, 0.47) | 0.00 (0.00, 0.10)  | 0.00 (0.00, 0.12) | 0.0006 | 0.0911 | 0.0135 | 0.9282 |
| OTU1468 | Firmicutes     | <i>Lachnospiraceae</i>                   |                         | 0.00 (0.00, 0.03)  | 0.00 (0.00, 0.11) | 0.02 (0.00, 0.26) | 0.00 (0.00, 0.03)  | 0.00 (0.00, 0.00) | 0.4667 | 0.9333 | 0.0816 | 1.0000 |
| OTU0192 | Firmicutes     | <i>Lachnospiraceae</i>                   |                         | 0.00 (0.00, 0.14)  | 0.00 (0.00, 0.19) | 0.01 (0.00, 0.14) | 0.00 (0.00, 0.00)  | 0.00 (0.00, 0.23) | 0.2000 | 0.1538 | 0.0769 | 0.2000 |
| OTU0106 | Bacteroidetes  | <i>Rikenellaceae</i>                     | <i>Alistipes</i>        | 0.00 (0.00, 0.10)  | 0.00 (0.00, 0.13) | 0.00 (0.00, 0.00) | 0.01 (0.00, 0.11)  | 0.00 (0.00, 0.00) | 0.6084 | 0.7552 | 0.0769 | 0.0769 |
| OTU0069 | Proteobacteria | <i>Desulfovibrionaceae</i>               |                         | 5.95 (2.90, 15.18) | 4.18 (2.05, 5.67) | 5.18 (3.66, 8.15) | 6.30 (2.71, 10.79) | 3.49 (2.13, 7.26) | 0.7984 | 0.0721 | 0.2345 | 0.0499 |
| OTU0996 | Firmicutes     | <i>Clostridiales_Incertae Sedis XIII</i> | <i>Anaerovorax</i>      | 0.04 (0.00, 0.14)  | 0.00 (0.00, 0.03) | 0.00 (0.00, 0.03) | 0.03 (0.00, 0.13)  | 0.00 (0.00, 0.05) | 0.7030 | 0.0765 | 0.0493 | 0.0797 |
| OTU0947 | Firmicutes     | <i>Ruminococcaceae</i>                   | <i>Anaerotruncus</i>    | 0.00 (0.00, 0.06)  | 0.09 (0.00, 0.49) | 0.03 (0.00, 0.60) | 0.11 (0.02, 0.16)  | 0.00 (0.00, 0.27) | 0.0135 | 0.9259 | 0.4859 | 0.0154 |

|         |                 |                            |                                            |                   |                   |                    |                    |                   |        |        |        |        |
|---------|-----------------|----------------------------|--------------------------------------------|-------------------|-------------------|--------------------|--------------------|-------------------|--------|--------|--------|--------|
| OTU0051 | Firmicutes      | <i>Ruminococcaceae</i>     | <i>Oscillibacter</i>                       | 0.91 (0.42, 1.99) | 1.27 (0.95, 5.49) | 2.15 (1.37, 4.33)  | 3.55 (1.58, 4.13)  | 0.84 (0.35, 2.40) | 0.0003 | 0.1520 | 0.2345 | 0.0006 |
| OTU0092 | Firmicutes      | <i>Ruminococcaceae</i>     | <i>Oscillibacter</i>                       | 0.10 (0.00, 0.32) | 0.25 (0.03, 0.53) | 0.07 (0.00, 0.28)  | 0.25 (0.09, 0.84)  | 0.05 (0.00, 0.10) | 0.0640 | 0.6943 | 0.0070 | 0.0003 |
| OTU0482 | Firmicutes      | <i>Ruminococcaceae</i>     | <i>Flavonifractor</i>                      | 0.09 (0.00, 0.23) | 0.08 (0.00, 0.45) | 0.20 (0.00, 0.63)  | 0.22 (0.07, 0.41)  | 0.02 (0.00, 0.31) | 0.0373 | 0.2204 | 0.5737 | 0.0185 |
| OTU0206 | Firmicutes      | <i>Lachnospiraceae</i>     | <i>Roseburia</i>                           | 0.14 (0.00, 0.80) | 0.19 (0.16, 1.30) | 0.03 (0.00, 1.07)  | 0.51 (0.14, 1.06)  | 0.14 (0.00, 0.28) | 0.2325 | 0.5358 | 0.0103 | 0.0103 |
| OTU0095 | Firmicutes      | <i>Lachnospiraceae</i>     | <i>Lachnospiraceae_incertain_sedis</i>     | 1.20 (0.00, 5.04) | 2.51 (0.62, 4.81) | 4.12 (0.26, 11.19) | 6.10 (4.20, 13.17) | 0.05 (0.00, 3.71) | 0.0070 | 0.0012 | 0.2786 | 0.0002 |
| OTU0107 | Firmicutes      | <i>Lachnospiraceae</i>     | <i>Lachnospiraceae_incertain_sedis</i>     | 0.00 (0.00, 0.24) | 0.03 (0.00, 0.19) | 0.24 (0.00, 0.37)  | 0.18 (0.00, 1.21)  | 0.01 (0.00, 0.57) | 0.0483 | 0.0768 | 0.6681 | 0.0348 |
| OTU0018 | Firmicutes      | <i>Lachnospiraceae</i>     | <i>Lachnospiraceae_incertain_sedis</i>     | 0.09 (0.00, 0.51) | 0.05 (0.00, 0.42) | 0.04 (0.00, 0.32)  | 0.14 (0.02, 0.45)  | 0.02 (0.00, 0.13) | 0.3667 | 0.1501 | 0.0822 | 0.0146 |
| OTU0149 | Firmicutes      | <i>Lachnospiraceae</i>     | <i>Marvinbryantia</i>                      | 0.09 (0.00, 0.69) | 0.10 (0.00, 0.26) | 0.08 (0.00, 1.34)  | 0.30 (0.16, 0.98)  | 0.11 (0.00, 0.65) | 0.0278 | 0.0059 | 0.1009 | 0.0494 |
| OTU0193 | Firmicutes      | <i>Lachnospiraceae</i>     |                                            | 0.00 (0.00, 0.03) | 0.41 (0.03, 1.01) | 0.19 (0.00, 2.97)  | 0.33 (0.12, 1.28)  | 0.00 (0.00, 0.02) | 0.0002 | 1.0000 | 0.1540 | 0.0002 |
| OTU0284 | Firmicutes      | <i>Lachnospiraceae</i>     | <i>Clostridium XIVb</i>                    | 0.43 (0.23, 0.88) | 0.25 (0.09, 0.83) | 0.62 (0.37, 1.22)  | 0.77 (0.49, 1.20)  | 0.19 (0.06, 0.73) | 0.0148 | 0.0289 | 0.1949 | 0.0011 |
| OTU0604 | Firmicutes      | <i>Lachnospiraceae</i>     |                                            | 0.03 (0.00, 0.11) | 0.03 (0.00, 0.05) | 0.04 (0.00, 0.17)  | 0.13 (0.07, 0.41)  | 0.05 (0.00, 0.10) | 0.0011 | 0.0003 | 0.0068 | 0.0019 |
| OTU0075 | Firmicutes      | <i>Lachnospiraceae</i>     | <i>Dorea</i>                               | 0.91 (0.46, 1.85) | 0.50 (0.24, 1.93) | 1.34 (1.07, 2.14)  | 1.49 (0.53, 2.47)  | 0.65 (0.38, 1.11) | 0.1605 | 0.0289 | 0.9591 | 0.0379 |
| OTU0241 | Firmicutes      | <i>Lachnospiraceae</i>     | <i>Dorea</i>                               | 0.30 (0.00, 1.65) | 0.42 (0.00, 0.97) | 0.00 (0.00, 1.11)  | 0.54 (0.06, 1.79)  | 0.10 (0.00, 1.10) | 0.2786 | 0.4634 | 0.0193 | 0.0482 |
| OTU0146 | Firmicutes      | <i>Lachnospiraceae</i>     |                                            | 0.04 (0.00, 0.83) | 0.03 (0.00, 0.47) | 0.18 (0.00, 0.42)  | 0.19 (0.08, 0.45)  | 0.10 (0.00, 0.27) | 0.2325 | 0.0202 | 0.4396 | 0.1293 |
| OTU0042 | Firmicutes      | <i>Lachnospiraceae</i>     |                                            | 0.00 (0.00, 0.03) | 0.00 (0.00, 0.04) | 0.00 (0.00, 0.08)  | 0.06 (0.00, 0.13)  | 0.00 (0.00, 0.00) | 0.0256 | 0.0721 | 0.0928 | 0.0256 |
| OTU0177 | Firmicutes      | <i>Lachnospiraceae</i>     |                                            | 0.07 (0.00, 0.63) | 1.39 (0.98, 2.29) | 1.27 (0.05, 3.10)  | 1.91 (0.66, 3.01)  | 0.02 (0.00, 1.56) | 0.0002 | 0.3969 | 0.5054 | 0.0011 |
| OTU0365 | Firmicutes      | <i>Lachnospiraceae</i>     | <i>Lachnospiraceae_incertain_sedis</i>     | 0.00 (0.00, 0.00) | 0.00 (0.00, 0.00) | 0.00 (0.00, 0.03)  | 0.01 (0.00, 0.00)  | 0.00 (0.00, 0.00) | 0.0769 | 0.1026 | 0.0769 | 0.0769 |
| OTU0026 | Verrucomicrobia | <i>Verrucomicrobiaceae</i> | <i>Akkermansia</i>                         | 0.52 (0.02, 2.96) | 0.00 (0.00, 1.38) | 0.56 (0.00, 4.07)  | 0.72 (0.00, 12.89) | 1.43 (0.56, 8.79) | 0.5737 | 0.0662 | 0.5949 | 0.1049 |
| OTU0108 | Bacteroidetes   | <i>Porphyromonadaceae</i>  |                                            | 0.06 (0.00, 0.66) | 0.00 (0.00, 0.00) | 0.20 (0.00, 0.87)  | 0.48 (0.23, 3.12)  | 0.15 (0.00, 4.75) | 0.0070 | 0.0003 | 0.0368 | 0.2771 |
| OTU0441 | Firmicutes      | <i>Erysipelotrichaceae</i> | <i>Allobaculum</i>                         | 0.00 (0.00, 0.00) | 0.13 (0.00, 0.61) | 0.00 (0.00, 1.16)  | 0.01 (0.00, 0.31)  | 0.00 (0.00, 0.04) | 0.0769 | 0.0497 | 0.9608 | 0.1282 |
| OTU0721 | Firmicutes      | <i>Erysipelotrichaceae</i> | <i>Erysipelotrichaceae_incertain_sedis</i> | 0.01 (0.00, 0.12) | 0.00 (0.00, 0.03) | 0.00 (0.00, 0.07)  | 0.02 (0.00, 0.09)  | 0.01 (0.00, 0.05) | 0.8749 | 0.0895 | 0.0816 | 0.4822 |
| OTU0296 | Firmicutes      | Unclassified_Clostridiales |                                            | 0.49 (0.13, 1.72) | 0.12 (0.00, 2.33) | 0.44 (0.05, 1.97)  | 0.44 (0.26, 1.65)  | 0.53 (0.08, 0.90) | 1.0000 | 0.0199 | 0.6454 | 0.7984 |
| OTU0942 | Firmicutes      | Unclassified_Clostridiales |                                            | 0.00 (0.00, 0.00) | 0.00 (0.00, 0.00) | 0.00 (0.00, 0.00)  | 0.01 (0.00, 0.25)  | 0.00 (0.00, 0.03) | 0.0769 | 0.1026 | 0.0769 | 0.1282 |
| OTU1264 | Firmicutes      | <i>Ruminococcaceae</i>     |                                            | 0.00 (0.00, 0.00) | 0.00 (0.00, 0.03) | 0.00 (0.00, 0.02)  | 0.04 (0.00, 0.38)  | 0.00 (0.00, 0.17) | 0.0256 | 0.0373 | 0.0256 | 0.2821 |
| OTU0531 | Firmicutes      | <i>Ruminococcaceae</i>     | <i>Clostridium IV</i>                      | 0.01 (0.00, 0.16) | 0.00 (0.00, 0.15) | 0.19 (0.09, 0.33)  | 0.20 (0.00, 0.33)  | 0.07 (0.02, 0.20) | 0.0135 | 0.0186 | 0.8785 | 0.1304 |
| OTU0581 | Firmicutes      | <i>Ruminococcaceae</i>     | <i>Pseudoflavonifractor</i>                | 0.02 (0.00, 0.18) | 0.13 (0.00, 0.50) | 0.12 (0.02, 0.63)  | 0.26 (0.00, 0.53)  | 0.21 (0.00, 0.79) | 0.0295 | 0.2785 | 0.7984 | 0.6681 |
| OTU0062 | Firmicutes      | <i>Ruminococcaceae</i>     | <i>Pseudoflavonifractor</i>                | 0.47 (0.20, 0.85) | 0.88 (0.41, 2.06) | 0.69 (0.45, 2.48)  | 0.75 (0.43, 1.06)  | 0.65 (0.23, 1.40) | 0.0650 | 0.5358 | 0.9591 | 0.8785 |
| OTU0029 | Firmicutes      | <i>Lachnospiraceae</i>     |                                            | 0.06 (0.00, 0.46) | 0.00 (0.00, 0.00) | 0.00 (0.00, 0.00)  | 0.02 (0.00, 0.12)  | 0.15 (0.00, 0.39) | 0.2706 | 0.0373 | 0.0256 | 0.0611 |
| OTU0191 | Firmicutes      | <i>Lachnospiraceae</i>     |                                            | 0.09 (0.00, 0.63) | 0.13 (0.00, 0.24) | 0.00 (0.00, 0.42)  | 0.07 (0.00, 0.48)  | 0.05 (0.00, 0.44) | 0.8922 | 0.2925 | 0.0884 | 0.9854 |
| OTU0628 | Firmicutes      | <i>Lachnospiraceae</i>     | <i>Clostridium XIVa</i>                    | 0.00 (0.00, 0.23) | 0.00 (0.00, 0.04) | 0.00 (0.00, 0.00)  | 0.03 (0.00, 0.24)  | 0.00 (0.00, 0.05) | 0.5671 | 0.2200 | 0.0256 | 0.3756 |

|         |            |                        |                 |                      |                      |                      |                      |                      |        |        |        |        |
|---------|------------|------------------------|-----------------|----------------------|----------------------|----------------------|----------------------|----------------------|--------|--------|--------|--------|
| OTU0342 | Firmicutes | <i>Lachnospiraceae</i> | <i>Moryella</i> | 0.04 (0.00,<br>0.23) | 0.00 (0.00,<br>0.05) | 0.01 (0.00,<br>0.19) | 0.03 (0.00,<br>0.08) | 0.01 (0.00,<br>0.23) | 0.8757 | 0.0373 | 0.4182 | 0.6892 |
|---------|------------|------------------------|-----------------|----------------------|----------------------|----------------------|----------------------|----------------------|--------|--------|--------|--------|

168 **References of supplementary materials**

169

170 Caporaso JG, Kuczynski J, Stombaugh J, Bittinger K, Bushman FD, Costello EK *et al* (2010). QIIME allows  
171 analysis of high-throughput community sequencing data. *Nat Methods* **7**: 335-336.

172 Chiang SH, Bazuine M, Lumeng CN, Geletka LM, Mowers J, White NM *et al* (2009). The protein kinase  
173 IKKepsilon regulates energy balance in obese mice. *Cell* **138**: 961-975.

174 Klaus S, Pultz S, Thone-Reineke C, Wolfram S (2005). Epigallocatechin gallate attenuates diet-induced  
175 obesity in mice by decreasing energy absorption and increasing fat oxidation. *Int J Obes (Lond)* **29**:  
176 615-623.

177 Lumeng CN, Bodzin JL, Saltiel AR (2007). Obesity induces a phenotypic switch in adipose tissue  
178 macrophage polarization. *J Clin Invest* **117**: 175-184.

179 Masui S, Nakatake Y, Toyooka Y, Shimosato D, Yagi R, Takahashi K *et al* (2007). Pluripotency governed  
180 by Sox2 via regulation of Oct3/4 expression in mouse embryonic stem cells. *Nat Cell Biol* **9**:  
181 625-635.

182 Matsuda K, Tsuji H, Asahara T, Kado Y, Nomoto K (2007). Sensitive quantitative detection of  
183 commensal bacteria by rRNA-targeted reverse transcription-PCR. *Appl Environ Microbiol* **73**:  
184 32-39.

185 Matsuda K, Tsuji H, Asahara T, Matsumoto K, Takada T, Nomoto K (2009). Establishment of an  
186 analytical system for the human fecal microbiota, based on reverse transcription-quantitative PCR  
187 targeting of multicopy rRNA molecules. *Appl Environ Microbiol* **75**: 1961-1969.

188 Matsumoto M, Sakamoto M, Benno Y (2009). Dynamics of fecal microbiota in hospitalized elderly fed  
189 probiotic LKM512 yogurt. *Microbiol Immunol* **53**: 421-432.

190 Shibata R, Sato K, Kumada M, Izumiya Y, Sonoda M, Kihara S *et al* (2007). Adiponectin accumulates in  
191 myocardial tissue that has been damaged by ischemia-reperfusion injury via leakage from the  
192 vascular compartment. *Cardiovasc Res* **74**: 471-479.

193 Zhang C, Zhang M, Wang S, Han R, Cao Y, Hua W *et al* (2010). Interactions between gut microbiota,  
194 host genetics and diet relevant to development of metabolic syndromes in mice. *ISME J* **4**:  
195 232-241.

196

197

198 **Supplementary Figures**

199 **Figure S1**

200

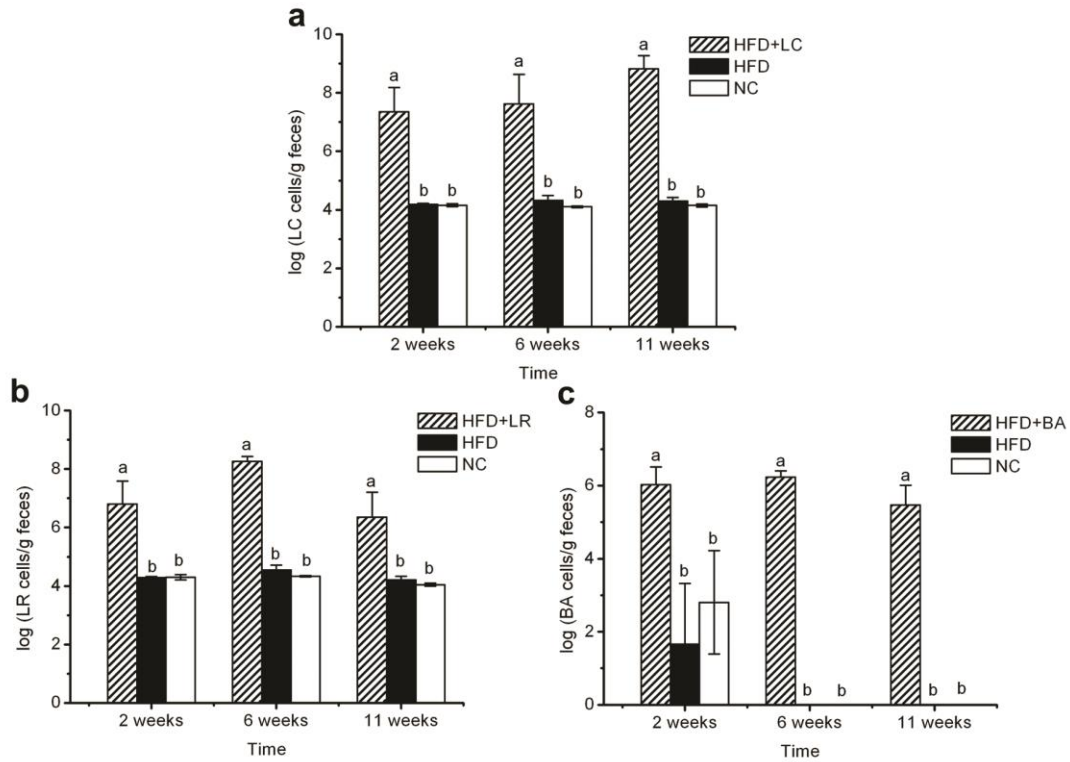

201

202

203 **Figure S1 The three candidate probiotics survived in the gut.** (a-c) The amount of  
204 LC, LR and BA in the feces of mice at 2nd, 6th and 11th week during the probiotic  
205 administration quantified by RT-qPCR. Data are shown as means  $\pm$  SEM. Values of  
206 each animal group with same letters are not significantly different by ANOVA  
207 followed by Tukey post hoc test. n = 3 mice per group.

208

209

210 **Figure S2**

211

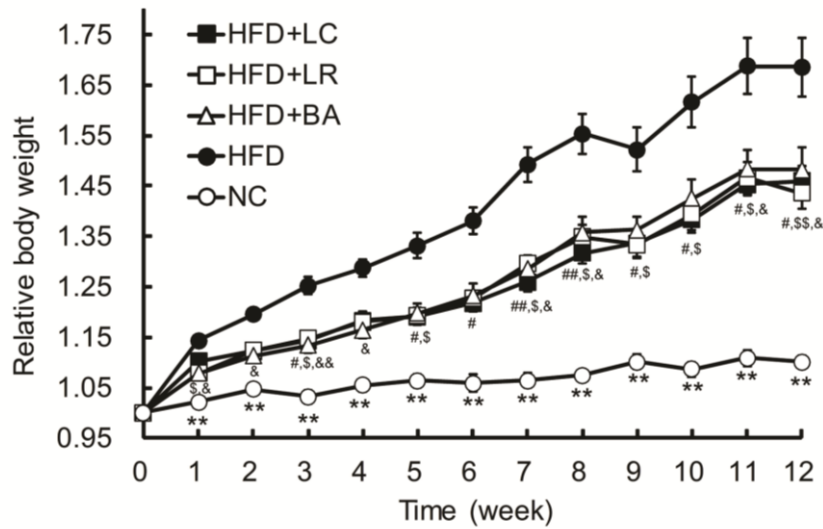

212

213

214 **Figure S2 The relative body weight curve of five groups of mice during the**  
 215 **12-week-intervention.** Relative body weight was calculated as body weight as  
 216 percentage of baseline weight for each mouse. Data are shown as means ± SEM. \*P <  
 217 0.05, \*\*P < 0.01: NC group vs. HFD group; #P < 0.05, ##P < 0.01: HFD+LC group vs.  
 218 HFD group; \$P < 0.05, \$\$P < 0.01: HFD+LR group vs. HFD group; &P < 0.05, &&P <  
 219 0.01: HFD+BA group vs. HFD group by ANOVA followed by Tukey post hoc test. n  
 220 = 8 mice per group.

221

222



223 **Figure S3**

224

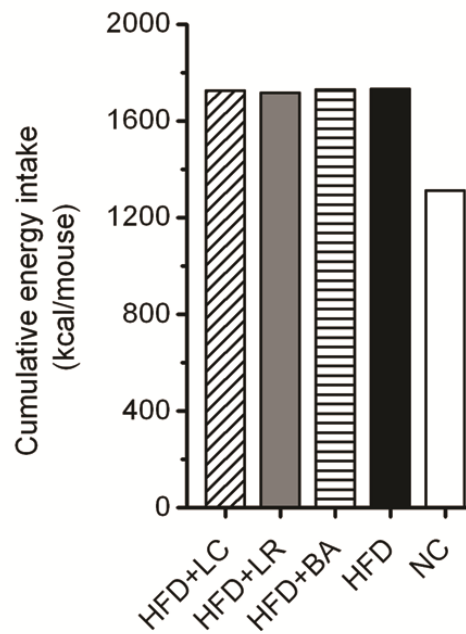

225

226

227 **Figure S3 Probiotics did not reduce energy intake.** Data are shown as means of  
228 food intake of two cages of 8 animals of each animal group.

229

230

231 **Figure S4**

232

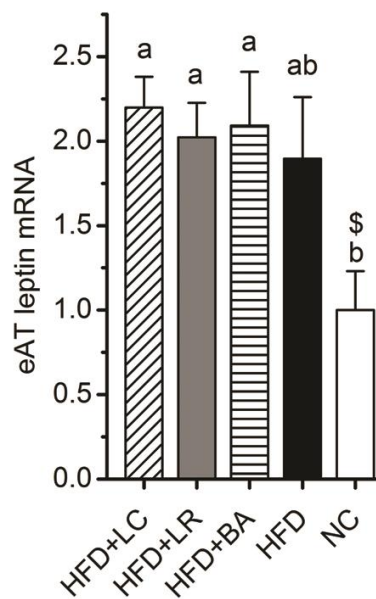

233

234

235 **Figure S4 Probiotics did not reduce the expression of leptin gene in eAT.** Data are

236 shown as means ± SEM. Values of each animal group with same letters are not

237 significantly different by ANOVA followed by Tukey post hoc test. \$: P = 0.057 vs.

238 HFD group. n = 8 mice per group.

239

240

241 **Figure S5**

242

243

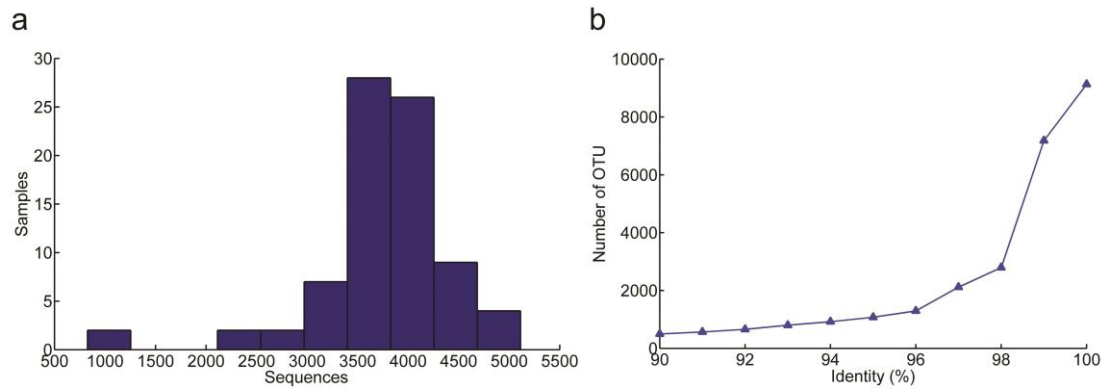

244

245

246 **Figure S5 454 pyrosequencing data of 80 fecal samples of five animal groups (8**

247 **animals/group) at baseline and 12th week. a: Sample distribution of 301, 568**

248 **usable reads, b: The numbers of OTUs identified at several different similarity levels.**

249

250

251 **Figure S6**

252

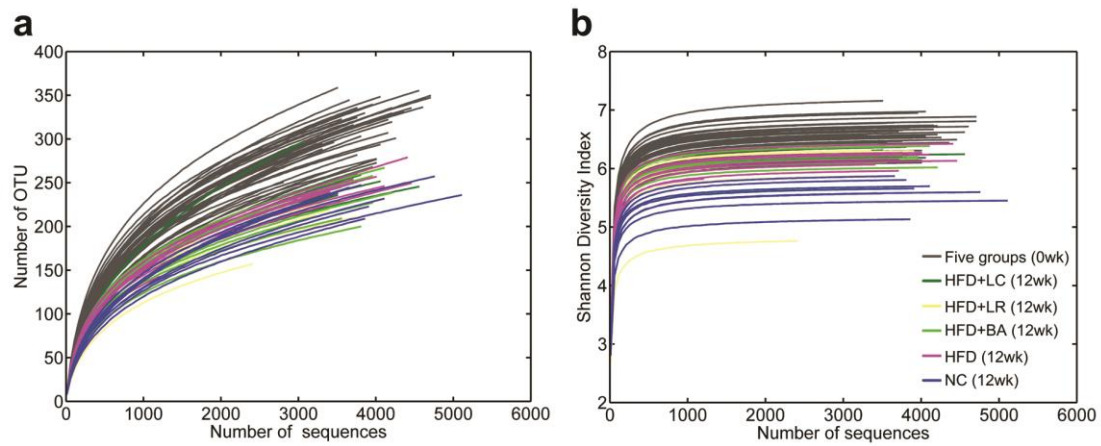

253

254

255 **Figure S6 Alpha-diversity analysis of 454 pyrosequencing of 80 fecal samples. (a)**

256 Rarefaction analysis. (b) Shannon Diversity Index curves. 0wk: before probiotics

257 intervention, 12wk: after 12 weeks of probiotics intervention.

258

259

260 **Figure S7**

261

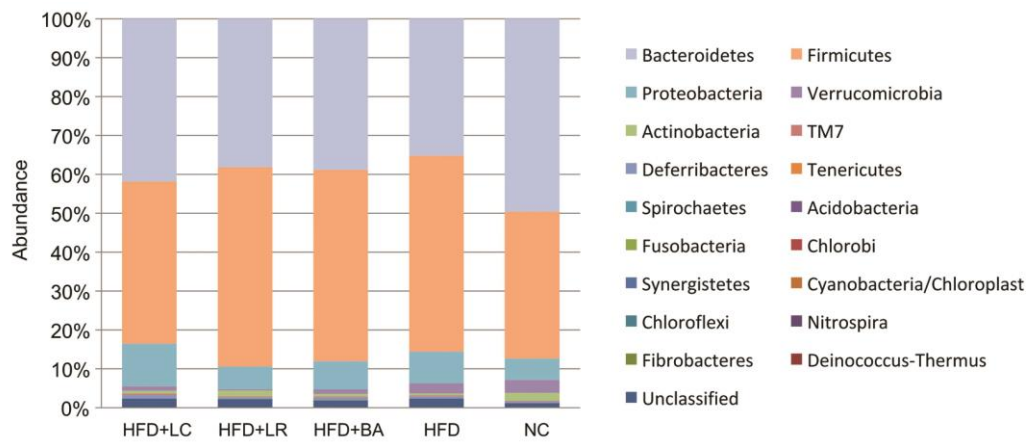

262

263

264 **Figure S7 Relative abundance of different phyla in the gut microbiota of five**  
265 **animal groups at 12th week of the trial.**

266

267

268 **Figure S8**

269

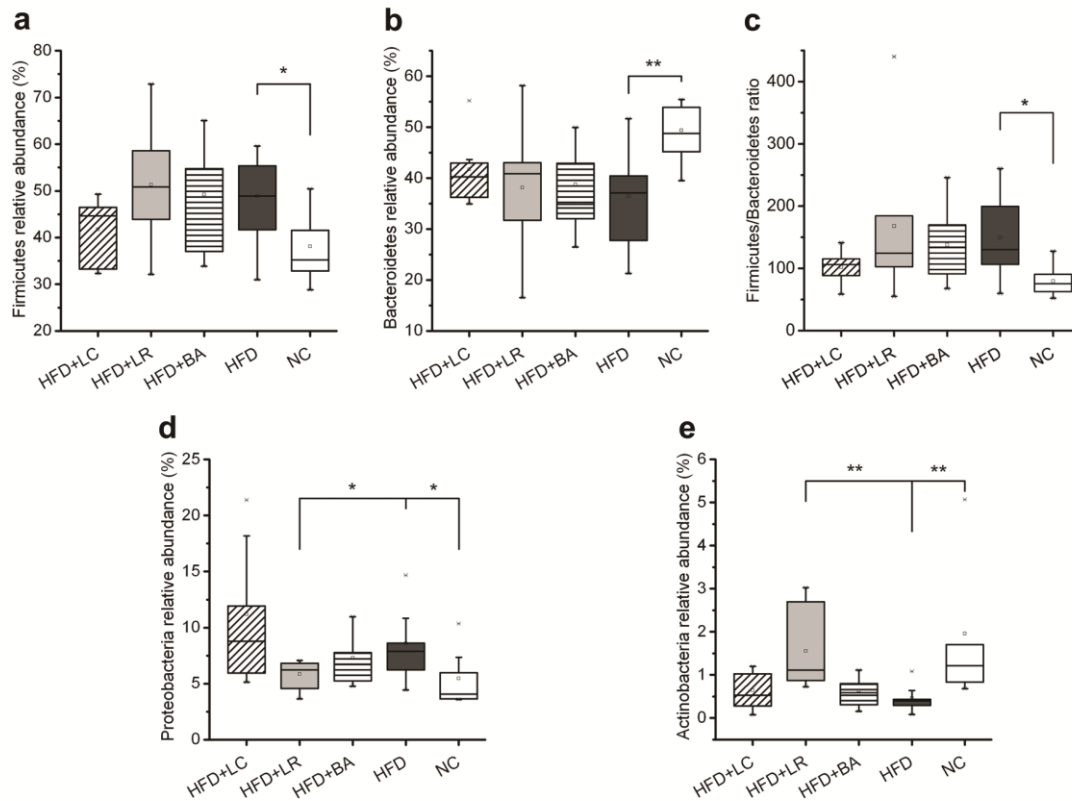

270  
271

272 **Figure S8 Relative abundance of four predominant phyla which was different**

273 **between HFD group and the other four groups at 12th week of the trial. (a)**

274 Firmicutes, (b) Bacteroidetes, (c) Firmicutes / Bacteroidetes ratio, (d) Proteobacteria,

275 (e) Actinobacteria. In the box plot, the bottom and top are respectively the 25th and

276 75th percentile, a line within the box marks the median, and a circle in the box shows

277 the mean. Whiskers above and below the box indicate 1.5 interquartile range of the

278 lower and upper quartile, and samples beyond are regarded as outliers. \*P < 0.05, \*\*P

279 < 0.01 by Mann-Whitney test.

280

281

282 **Figure S9**

283

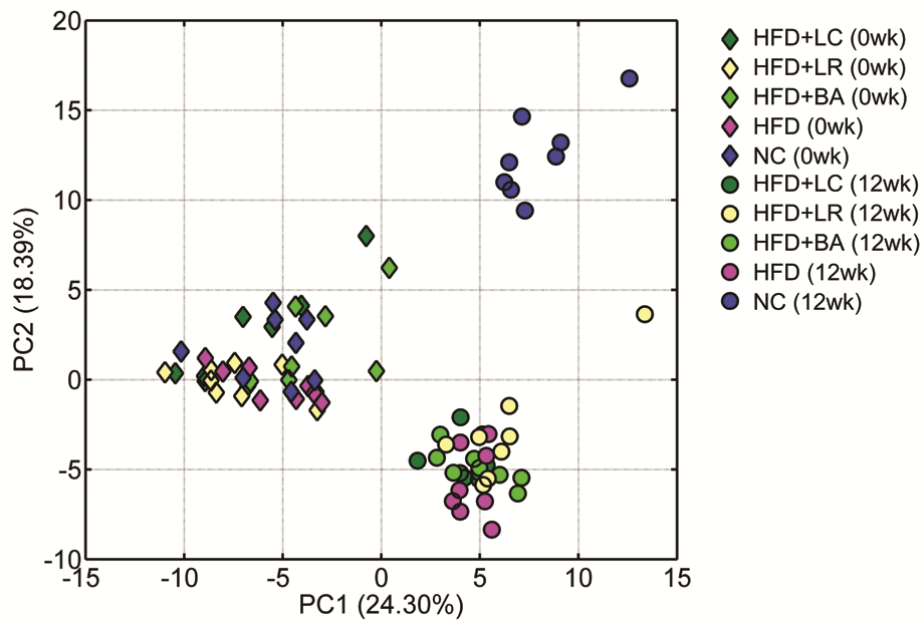

284

285

286 **Figure S9 PCA scores plot calculated with the OTU abundance matrix of all**

287 **animals at baseline and 12th week.** Each point represents the microbiota of a mouse.

288 0wk: before probiotic intervention, 12wk: after 12 weeks of probiotics intervention.

289

290

291 **Figure S10**

292

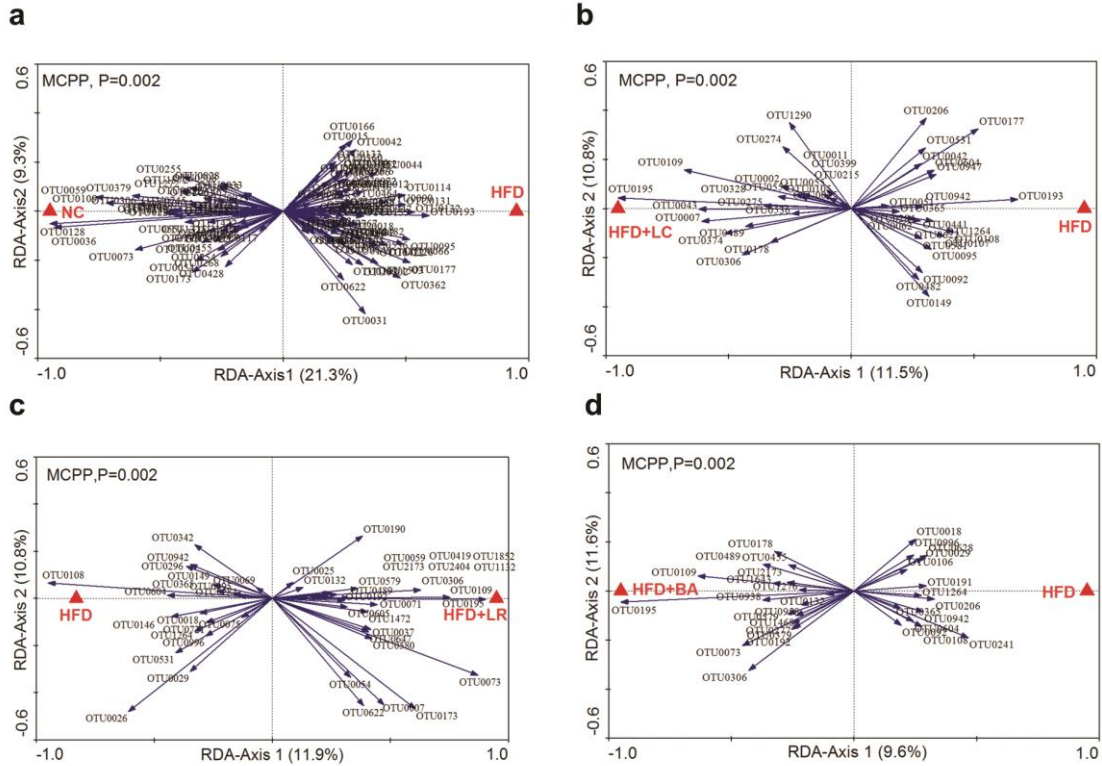

293

294

295 **Figure S10 Biplot of the RDA between HFD and NC (a), HFD+LC**  
296 **(c), and HFD+BA (d), respectively on relative abundance of OTUs (Log 10**  
297 **transformed). Constrained explanatory variables are indicated by red triangles. OTUs**  
298 **that have more than 24% of the variability in their values explained by the canonical**  
299 **axis are indicated by blue arrows. Upper left shows P-value of Monte Carlo**  
300 **Permutation Test.**

301

302



303 **Figure S11**

304

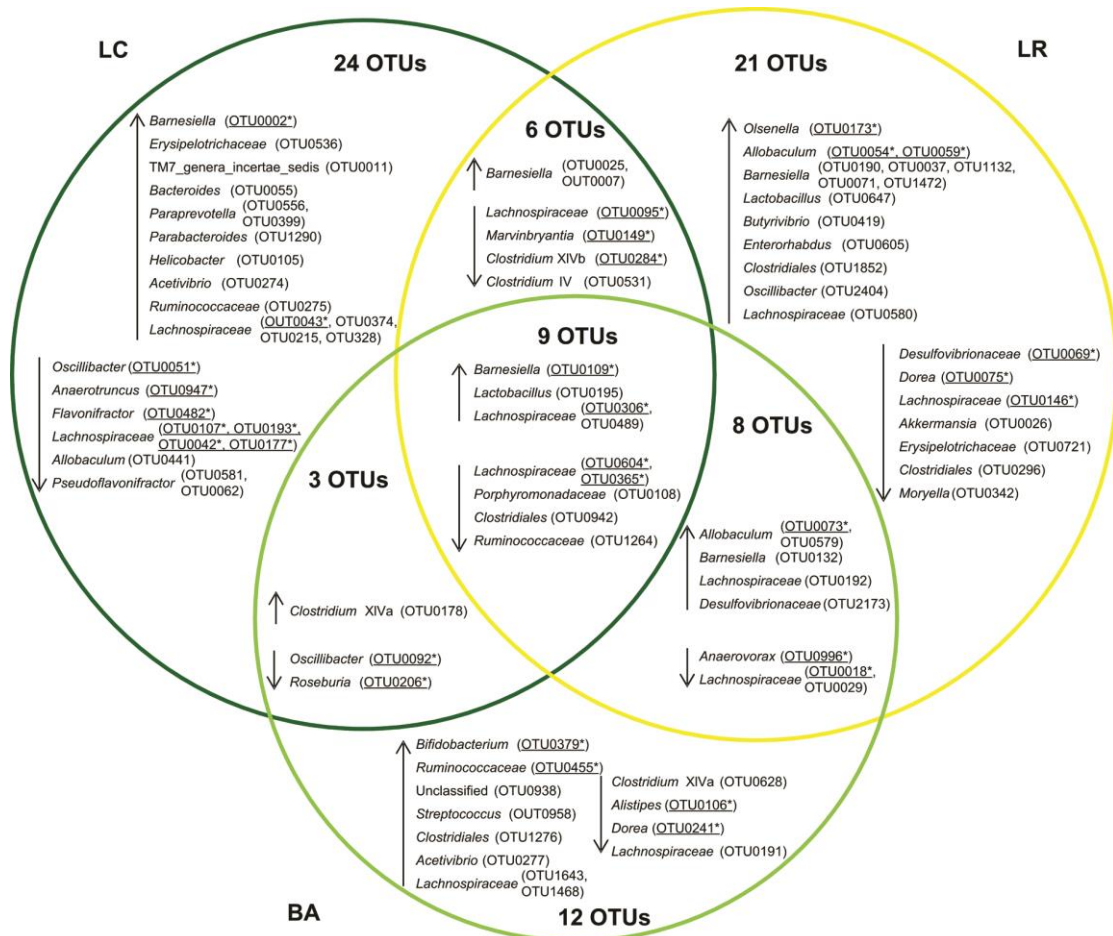

305

306

307 **Figure S11 Venn diagrams of 83 OTUs modulated by the three probiotics LC, LR**

308 **and BA.** The OTUs' phylogeny are listed. ↑ means increased by probiotics, and ↓

309 represents decreased by probiotics. \* represents the OTU whose abundance was

310 changed by HFD and then the change was reversed by probiotics.

311

312
